# Supplementary material for: Neoadjuvant pembrolizumab plus chemotherapy/adjuvant pembrolizumab for early-stage triple-negative breast cancer: quality-of-life results from the randomized KEYNOTE-522 study
Source: PubMed Central journal article supplement — J Natl Cancer Inst. 2024 Jun 24;116(10):1654–63. doi: 10.1093/jnci/djae129 (PMC11461162; doi:10.1093/jnci/djae129), 2024-06-24
Supplement: djae129_supplementary_data.pdf [file djae129_supplementary_data.pdf]

1 **SUPPLEMENTARY MATERIAL**

2 **Supplementary Table 1. Completion and compliance rates for patient-reported outcome questionnaires among patients with PD-L1 CPS**

3  $\geq 1$

| Neoadjuvant Phase                | QLQ-C30                                           |                                             | QLQ-BR23                                          |                                             | EQ-5D                                             |                                             |
|----------------------------------|---------------------------------------------------|---------------------------------------------|---------------------------------------------------|---------------------------------------------|---------------------------------------------------|---------------------------------------------|
|                                  | Pembrolizumab +<br>Chemotherapy<br><i>N</i> = 635 | Placebo +<br>Chemotherapy<br><i>N</i> = 312 | Pembrolizumab +<br>Chemotherapy<br><i>N</i> = 632 | Placebo +<br>Chemotherapy<br><i>N</i> = 311 | Pembrolizumab +<br>Chemotherapy<br><i>N</i> = 635 | Placebo +<br>Chemotherapy<br><i>N</i> = 312 |
| Baseline                         |                                                   |                                             |                                                   |                                             |                                                   |                                             |
| Completion, n (%) <sup>a</sup>   | 582 (91.7)                                        | 298 (95.5)                                  | 577 (91.3)                                        | 293 (94.2)                                  | 587 (92.4)                                        | 299 (95.8)                                  |
| Compliance, n/N (%) <sup>b</sup> | 582/635 (91.7)                                    | 298/311 (95.8)                              | 577/632 (91.3)                                    | 293/310 (94.5)                              | 587/635 (92.4)                                    | 299/311 (96.1)                              |
| Week 12                          |                                                   |                                             |                                                   |                                             |                                                   |                                             |
| Completion, n (%) <sup>a</sup>   | 530 (83.5)                                        | 266 (85.3)                                  | 526 (83.2)                                        | 265 (85.2)                                  | 538 (84.7)                                        | 272 (87.2)                                  |
| Compliance, n/N (%) <sup>b</sup> | 530/588 (90.1)                                    | 266/294 (90.5)                              | 526/586 (89.8)                                    | 265/293 (90.4)                              | 538/588 (91.5)                                    | 272/295 (92.2)                              |
| Week 21                          |                                                   |                                             |                                                   |                                             |                                                   |                                             |
| Completion, n (%) <sup>a</sup>   | 501 (78.9)                                        | 251 (80.4)                                  | 497 (78.6)                                        | 249 (80.1)                                  | 502 (79.1)                                        | 253 (81.1)                                  |
| Compliance, n/N (%) <sup>b</sup> | 501/569 (88.0)                                    | 251/287 (87.5)                              | 497/567 (87.7)                                    | 249/286 (87.1)                              | 502/569 (88.2)                                    | 253/287 (88.2)                              |

| <b>Adjuvant Phase</b>            | <b>Pembrolizumab<br/>N = 444</b> | <b>Placebo<br/>N = 256</b> | <b>Pembrolizumab<br/>N = 443</b> | <b>Placebo<br/>N = 254</b> | <b>Pembrolizumab<br/>N = 445</b> | <b>Placebo<br/>N = 258</b> |
|----------------------------------|----------------------------------|----------------------------|----------------------------------|----------------------------|----------------------------------|----------------------------|
| Baseline                         |                                  |                            |                                  |                            |                                  |                            |
| Completion, n (%) <sup>a</sup>   | 399 (89.9)                       | 232 (90.6)                 | 397 (89.6)                       | 231 (90.9)                 | 404 (90.8)                       | 234 (90.7)                 |
| Compliance, n/N (%) <sup>b</sup> | 399/444 (89.9)                   | 232/256 (90.6)             | 397/443 (89.6)                   | 231/254 (90.9)             | 404/445 (90.8)                   | 234/258 (90.7)             |
| Week 12                          |                                  |                            |                                  |                            |                                  |                            |
| Completion, n (%) <sup>a</sup>   | 398 (89.6)                       | 221 (86.3)                 | 396 (89.4)                       | 219 (86.2)                 | 398 (89.4)                       | 226 (87.6)                 |
| Compliance, n/N (%) <sup>b</sup> | 398/435 (91.5)                   | 221/251 (88.0)             | 396/434 (91.2)                   | 219/249 (88.0)             | 398/436 (91.3)                   | 226/253 (89.3)             |
| Week 24                          |                                  |                            |                                  |                            |                                  |                            |
| Completion, n (%) <sup>a</sup>   | 363 (81.8)                       | 204 (79.7)                 | 361 (81.5)                       | 202 (79.5)                 | 363 (81.6)                       | 204 (79.1)                 |
| Compliance, n/N (%) <sup>b</sup> | 363/398 (91.2)                   | 204/233 (87.6)             | 361/397 (90.9)                   | 202/231 (87.4)             | 363/399 (91.0)                   | 204/235 (86.8)             |

1 CPS, combined positive score; EQ-5D, EuroQol 5-Dimension Questionnaire; PD-L1, programmed cell death ligand 1; PRO, patient-reported  
2 outcome; QLQ-BR23, European Organisation for Research and Treatment of Cancer Breast Cancer–Specific Quality of Life Questionnaire;  
3 QLQ-C30, European Organisation for Research and Treatment of Cancer Quality of Life Questionnaire–Core 30.

4 <sup>a</sup>Completion rate: number of patients who completed  $\geq 1$  score/item over the number of patients in the PRO full analysis set population with PD-  
5 L1 CPS  $\geq 1$  at each time point.

6 <sup>b</sup>Compliance rate: number of patients who completed  $\geq 1$  score/item over the number of patients expected to complete at each time point  
7 excluding those missing by design (eg, due to death, discontinuation, translation unavailable etc.).

1 **Supplementary Table 2. LS mean score changes from baseline for each PRO in the neoadjuvant and adjuvant treatment phases among**  
 2 **patients with PD-L1 CPS  $\geq$ 1**

| PRO Instrument                                                     | Neoadjuvant Phase                          |                                            | Adjuvant Phase                        |                                       |
|--------------------------------------------------------------------|--------------------------------------------|--------------------------------------------|---------------------------------------|---------------------------------------|
|                                                                    | Pembrolizumab +<br>Chemotherapy            | Placebo +<br>Chemotherapy                  | Pembrolizumab                         | Placebo                               |
| <i>QLQ-C30 GHS/QoL</i>                                             |                                            |                                            |                                       |                                       |
| Mean (SD) at baseline <sup>a</sup>                                 | 77.39 (17.64)<br><i>N</i> = 582            | 78.41 (17.00)<br><i>N</i> = 298            | 74.00 (15.70)<br><i>N</i> = 399       | 72.88 (18.12)<br><i>N</i> = 232       |
| Mean (SD) at week 21/24 <sup>b</sup>                               | 66.55 (19.28)<br><i>N</i> = 501            | 67.26 (18.14)<br><i>N</i> = 251            | 75.60 (16.67)<br><i>N</i> = 363       | 75.65 (16.26)<br><i>N</i> = 204       |
| LS mean (95% CI) change from baseline to week 21/24 <sup>a,b</sup> | -11.63 (-13.35 to -9.91)<br><i>N</i> = 635 | -10.95 (-13.25 to -8.64)<br><i>N</i> = 312 | 1.88 (0.31 to 3.46)<br><i>N</i> = 444 | 2.49 (0.47 to 4.51)<br><i>N</i> = 256 |
| Difference in LS means (95% CI)                                    | -0.69 (-3.36 to 1.99)                      |                                            | -0.61 (-3.01 to 1.80)                 |                                       |
| <i>QLQ-C30 Physical Functioning</i>                                |                                            |                                            |                                       |                                       |
| Mean (SD) at baseline <sup>a</sup>                                 | 91.98 (12.61)<br><i>N</i> = 582            | 91.16 (13.34)<br><i>N</i> = 298            | 83.24 (15.71)<br><i>N</i> = 399       | 81.52 (16.03)<br><i>N</i> = 232       |
| Mean (SD) at week 21/24 <sup>b</sup>                               | 76.61 (19.37)<br><i>N</i> = 501            | 78.51 (17.19)<br><i>N</i> = 251            | 84.39 (15.93)<br><i>N</i> = 363       | 85.26 (14.81)<br><i>N</i> = 204       |

|                                                                    |                                      |                                      |                                |                                |
|--------------------------------------------------------------------|--------------------------------------|--------------------------------------|--------------------------------|--------------------------------|
| LS mean (95% CI) change from baseline to week 21/24 <sup>a,b</sup> | -15.86 (-17.37 to -14.35)<br>N = 635 | -12.86 (-14.96 to -10.75)<br>N = 312 | 1.43 (0.17 to 2.70)<br>N = 444 | 3.31 (1.67 to 4.95)<br>N = 256 |
| Difference in LS means (95% CI)                                    | -3.01 (-5.55 to -0.46)               |                                      | -1.87 (-3.85 to 0.10)          |                                |

---

*QLQ-C30 Emotional Functioning*

---

|                                                                    |                                   |                                  |                                   |                                  |
|--------------------------------------------------------------------|-----------------------------------|----------------------------------|-----------------------------------|----------------------------------|
| Mean (SD) at baseline <sup>a</sup>                                 | 76.06 (19.52)<br>N = 582          | 74.75 (20.79)<br>N = 298         | 81.73 (18.06)<br>N = 399          | 78.16 (20.64)<br>N = 232         |
| Mean (SD) at week 21/24 <sup>b</sup>                               | 74.09 (20.92)<br>N = 501          | 74.37 (22.11)<br>N = 251         | 78.88 (20.17)<br>N = 363          | 77.70 (20.18)<br>N = 204         |
| LS mean (95% CI) change from baseline to week 21/24 <sup>a,b</sup> | -1.74 (-3.44 to -0.03)<br>N = 635 | -0.67 (-2.99 to 1.65)<br>N = 312 | -1.94 (-3.67 to -0.21)<br>N = 444 | -0.94 (-3.19 to 1.32)<br>N = 256 |
| Difference in LS means (95% CI)                                    | -1.07 (-3.82 to 1.68)             |                                  | -1.00 (-3.74 to 1.74)             |                                  |

---

*QLQ-BR23 Breast Symptoms*

---

|                                                                    |                                    |                                    |                                   |                                   |
|--------------------------------------------------------------------|------------------------------------|------------------------------------|-----------------------------------|-----------------------------------|
| Mean (SD) at baseline <sup>a</sup>                                 | 18.34 (20.03)<br>N = 577           | 18.29 (18.85)<br>N = 293           | 22.19 (18.97)<br>N = 397          | 23.77 (20.51)<br>N = 231          |
| Mean (SD) at week 21/24 <sup>b</sup>                               | 9.05 (13.22)<br>N = 497            | 9.04 (14.98)<br>N = 249            | 17.29 (17.55)<br>N = 361          | 17.08 (17.71)<br>N = 202          |
| LS mean (95% CI) change from baseline to week 21/24 <sup>a,b</sup> | -9.43 (-11.03 to -7.84)<br>N = 632 | -9.19 (-11.17 to -7.21)<br>N = 311 | -5.47 (-7.26 to -3.67)<br>N = 443 | -6.27 (-8.53 to -4.00)<br>N = 254 |
| Difference in LS means (95% CI)                                    | -0.24 (-2.28 to 1.79)              |                                    | 0.80 (-1.82 to 3.42)              |                                   |

---

---

*EQ-5D VAS*

---

|                                                                    |                                           |                                          |                                       |                                       |
|--------------------------------------------------------------------|-------------------------------------------|------------------------------------------|---------------------------------------|---------------------------------------|
| Mean (SD) at baseline <sup>a</sup>                                 | 81.17 (18.17)<br><i>N</i> = 587           | 82.00 (17.51)<br><i>N</i> = 299          | 78.29 (14.87)<br><i>N</i> = 404       | 78.69 (14.56)<br><i>N</i> = 234       |
| Mean (SD) at week 21/24 <sup>b</sup>                               | 72.37 (17.97)<br><i>N</i> = 502           | 74.19 (16.68)<br><i>N</i> = 253          | 80.90 (14.46)<br><i>N</i> = 363       | 80.81 (13.29)<br><i>N</i> = 204       |
| LS mean (95% CI) change from baseline to week 21/24 <sup>a,b</sup> | -9.26 (-10.93 to -7.59)<br><i>N</i> = 635 | -7.71 (-9.90 to -5.52)<br><i>N</i> = 312 | 2.50 (1.29 to 3.71)<br><i>N</i> = 445 | 2.15 (0.59 to 3.71)<br><i>N</i> = 258 |
| Difference in LS means (95% CI)                                    | -1.55 (-4.03 to 0.93)                     |                                          | 0.35 (-1.52 to 2.21)                  |                                       |

---

1 CPS, combined positive score; EQ-5D VAS, EuroQoL 5-Dimension Questionnaire Visual Analog Scale; GHS/QoL, global health status/quality  
2 of life; LS, least squares; PD-L1, programmed cell death ligand 1; PRO, patient-reported outcome; QLQ-BR23, European Organisation for  
3 Research and Treatment of Cancer Breast Cancer-Specific Quality of Life Questionnaire; QLQ-C30, European Organisation for Research and  
4 Treatment of Cancer Quality of Life Questionnaire-Core 30; SD, standard deviation.

5 <sup>a</sup>Baseline refers to the baseline time point for the respective phase (neoadjuvant or adjuvant).

6 <sup>b</sup>The analysis time point was week 21 in the neoadjuvant phase and week 24 in the adjuvant phase.

1 **Supplementary Figure 1.** Change from baseline to week 21 in the neoadjuvant phase among  
2 patients with PD-L1 CPS  $\geq$ 1: (A) QLQ-C30 GHS/QoL and functional scales, (B) QLQ-C30  
3 symptom scales or items, (C) QLQ-BR23 functional scales or items, and (D) QLQ-BR23  
4 symptom scales or items. For GHS/QoL score and all functional scales, a higher score  
5 denotes better HRQoL or function. For symptoms scales or items, a higher score denotes  
6 worse symptoms.

7 CPS, combined positive score; GHS/QoL, global health status/quality of life; HRQoL, health-  
8 related quality of life; LS, least squares; PD-L1, programmed cell death ligand 1; QLQ-  
9 BR23, European Organisation for Research and Treatment of Cancer Breast Cancer–Specific  
10 Quality of Life Questionnaire; QLQ-C30, European Organisation for Research and Treatment  
11 of Cancer Quality of Life Questionnaire–Core 30.

1 **A. QLQ-C30 QHS/QoL and functional scales**

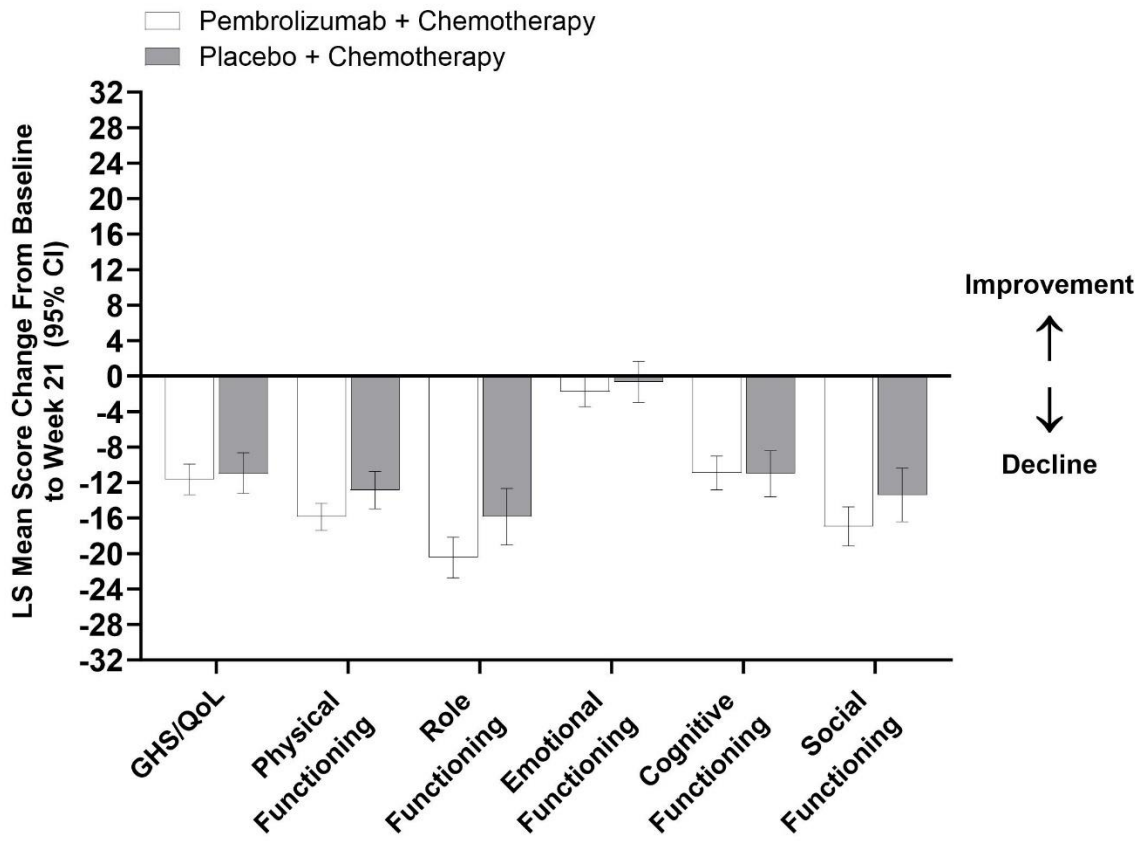

2

3 **B. QLQ-C30 symptom scales/items**

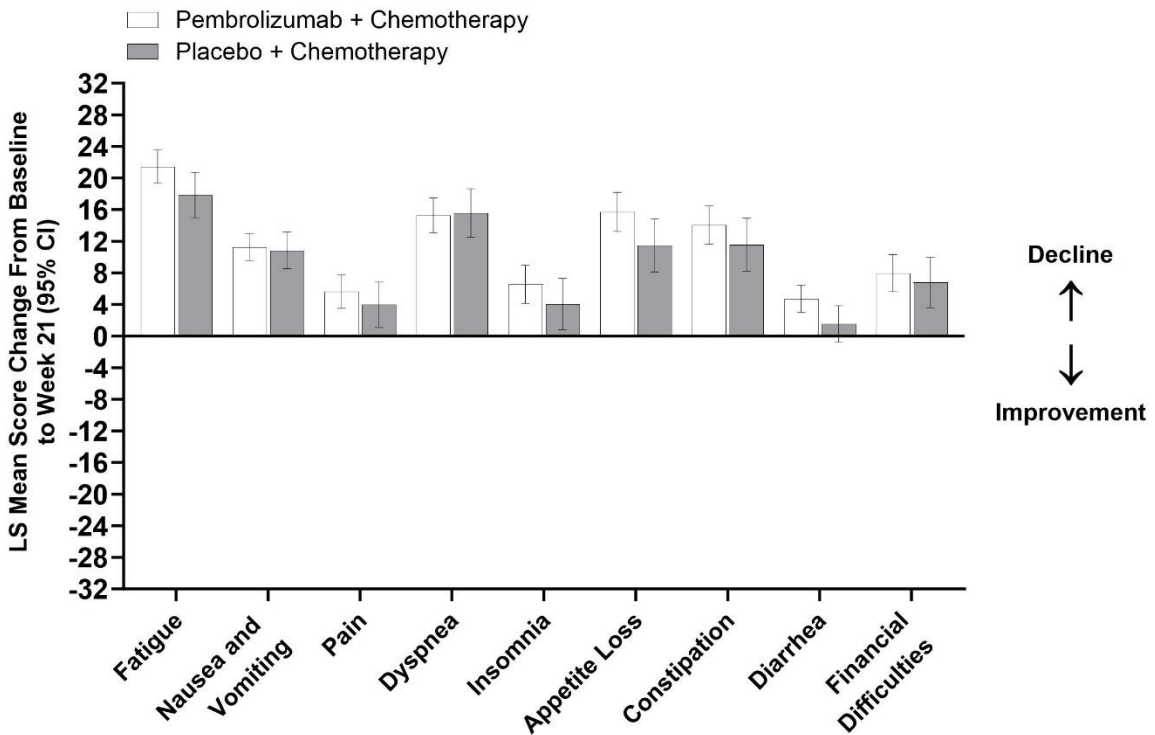

4

1 **C. QLQ-BR23 functional scales/items**

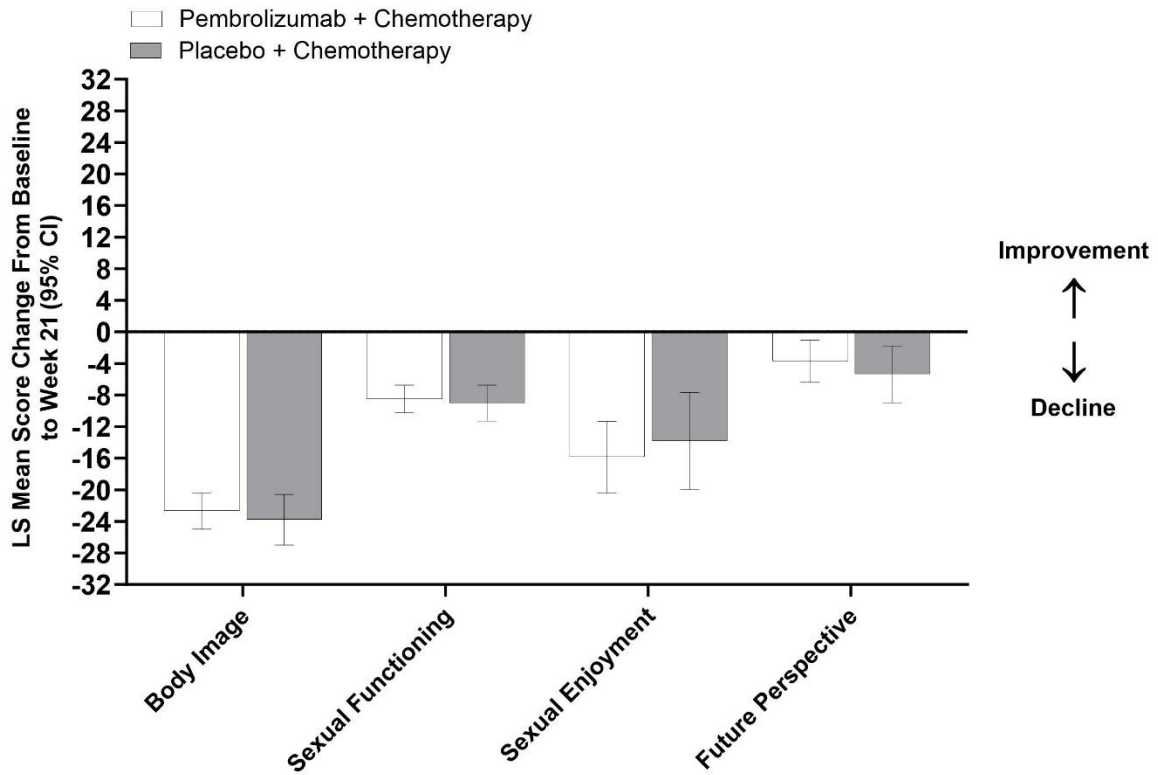

2

3 **D. QLQ-BR23 symptom scales/items**

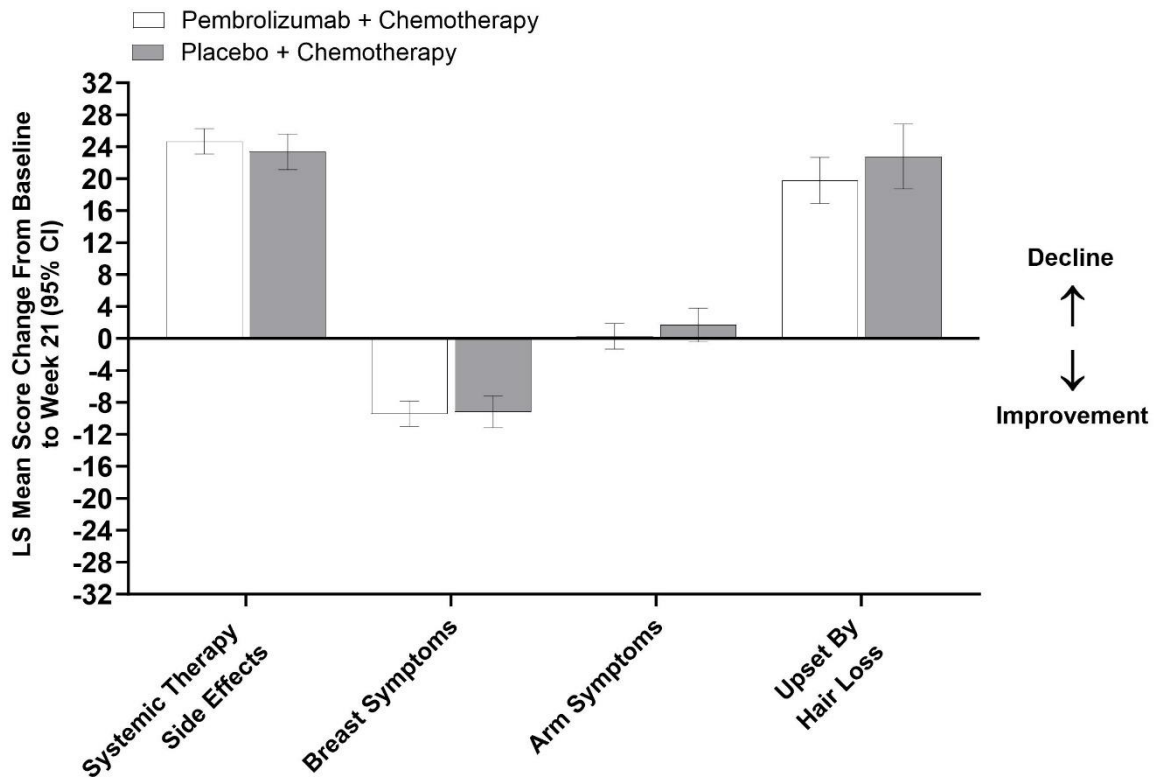

4



1 **Supplementary Figure 2.** Change from baseline to week 24 in the adjuvant phase among  
2 patients with PD-L1 CPS  $\geq$ 1: (A) QLQ-C30 GHS/QoL and functional scales, (B) QLQ-C30  
3 symptom scales or items, (C) QLQ-BR23 functional scales or items, and (D) QLQ-BR23  
4 symptom scales or items. For GHS/QoL score and all functional scales, a higher score  
5 denotes better HRQoL or function. For symptoms scales or items, a higher score denotes  
6 worse symptoms.

7 CPS, combined positive score; GHS/QoL, global health status/quality of life; HRQoL, health-  
8 related quality of life; LS, least squares; PD-L1, programmed cell death ligand 1; QLQ-  
9 BR23, European Organisation for Research and Treatment of Cancer Breast Cancer–Specific  
10 Quality of Life Questionnaire; QLQ-C30, European Organisation for Research and Treatment  
11 of Cancer Quality of Life Questionnaire–Core 30.

1 **A. QLQ-C30 QHS/QoL and functional scales**

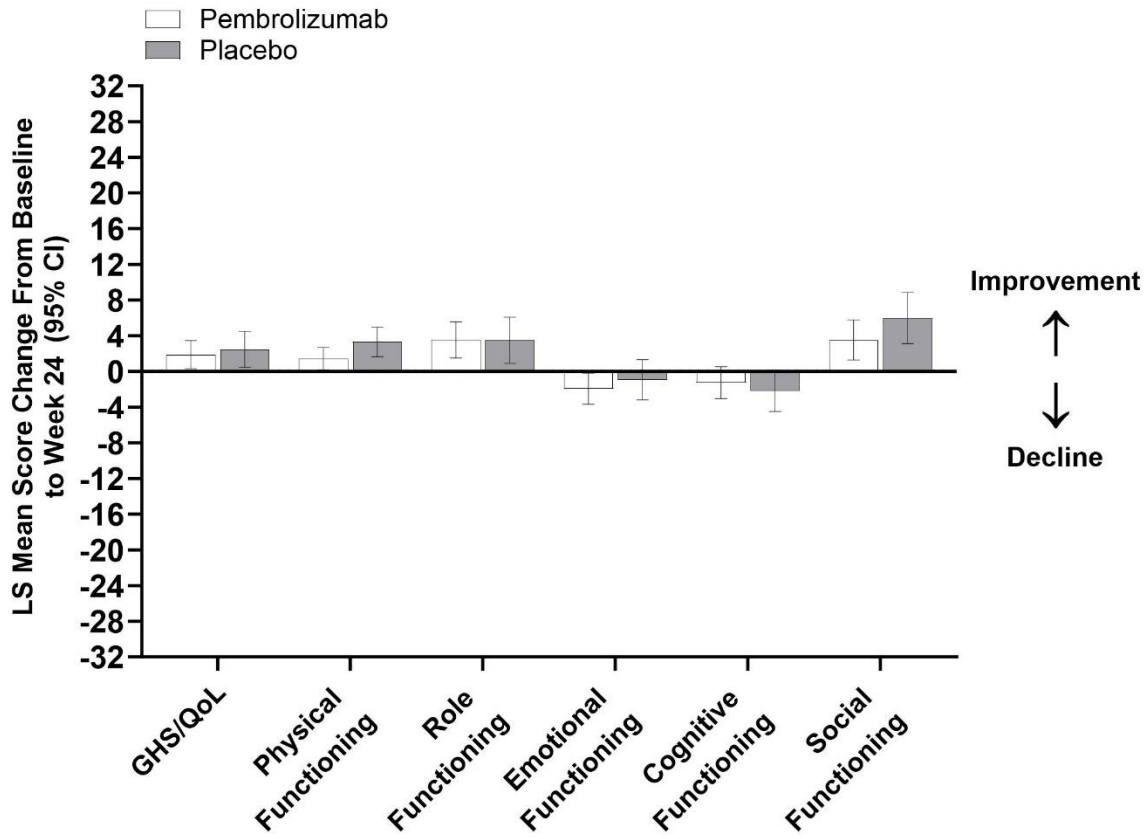

2

3 **B. QLQ-C30 symptom scales/items**

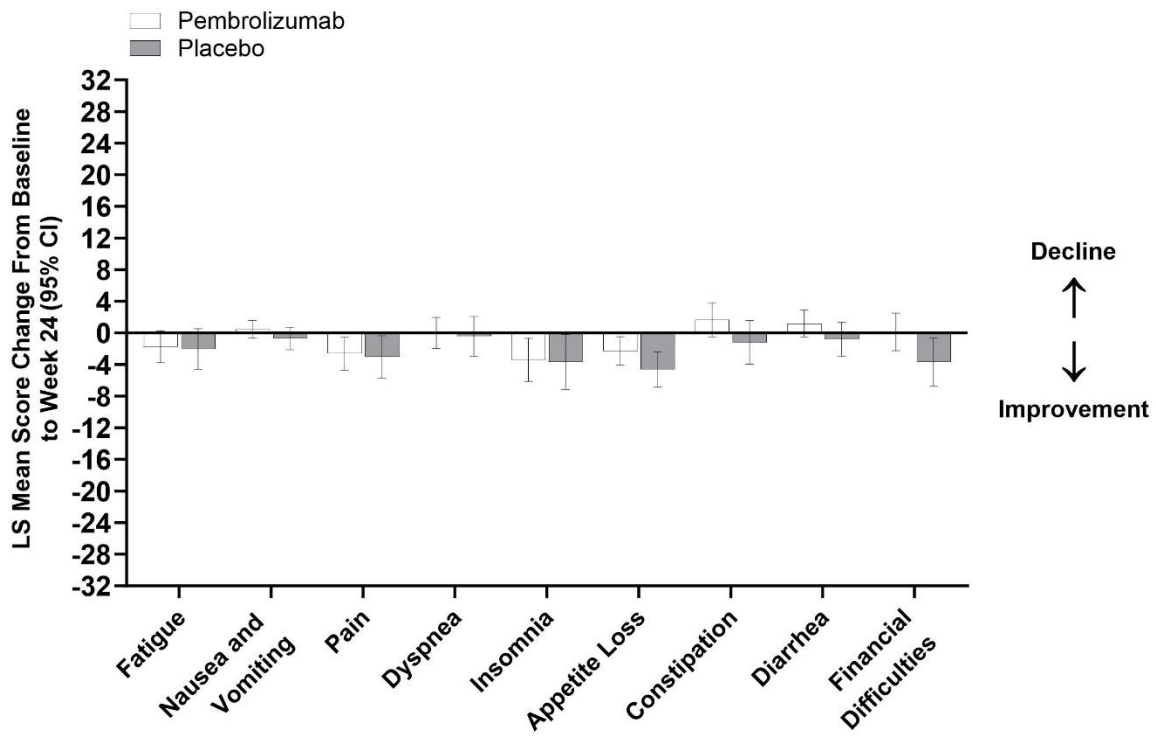

4

1 C. QLQ-BR23 functional scales/items

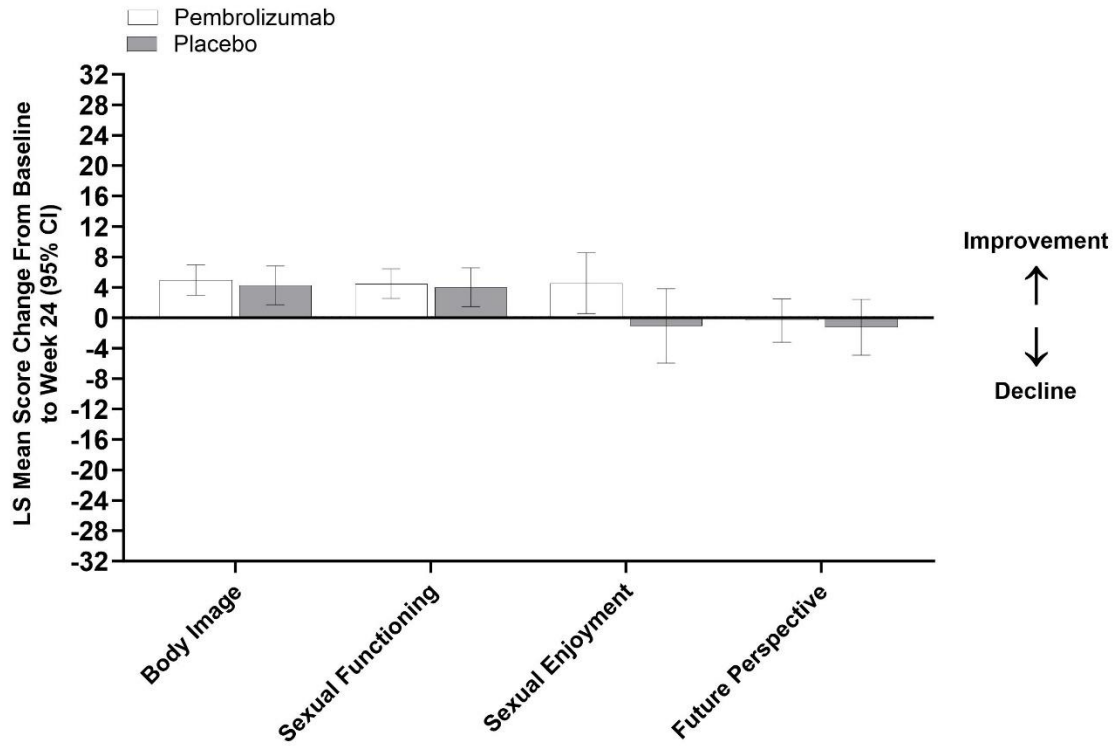

2

3 D. QLQ-BR23 symptom scales/items

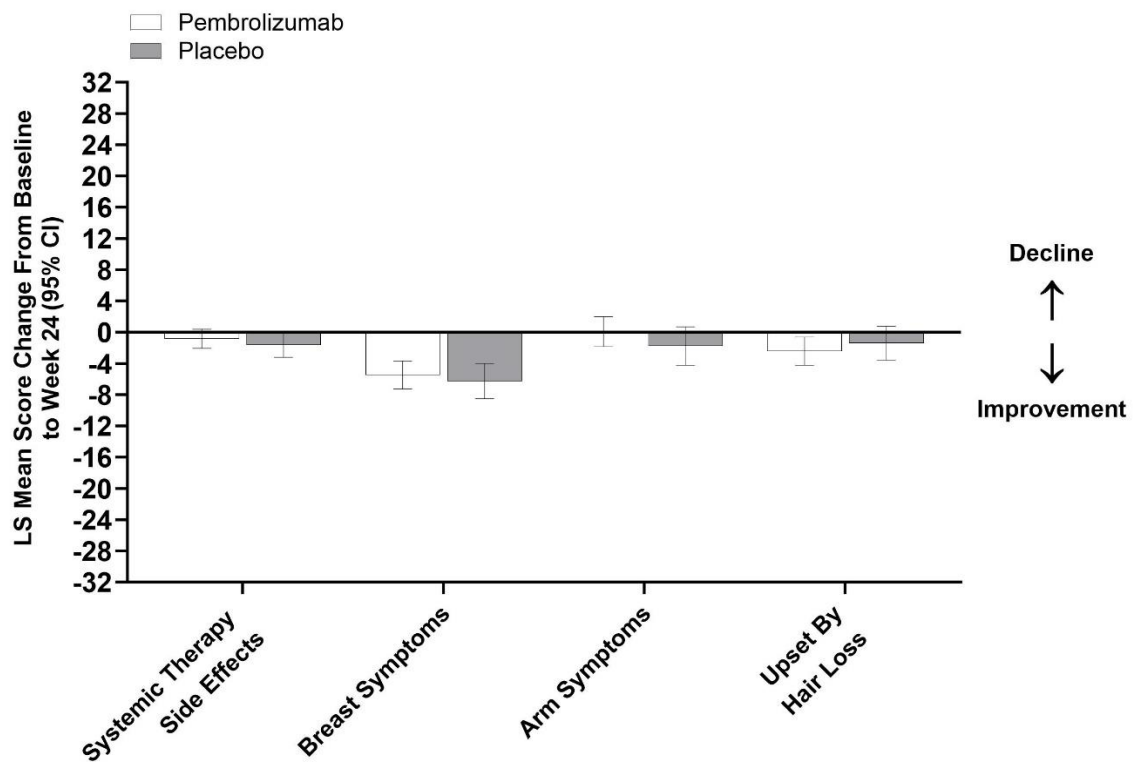

4
